# Supplementary material
Source: PubMed Central journal article supplement (PMC8072754)
Supplement: NIHPP2021.04.07.21255089-supplement-1.pdf [file NIHPP2021.04.07.21255089-supplement-1.pdf]

**Table S1.** Data from and calculations for excess mortality from CCP hesitancy based on the OWID database.

| Week       | Plasma Doses | Deaths | Hospitalized Patients | Admissions | Plasma Doses Per Patient | Mortality (Deaths / Admissions - 2 Week Shift) |
|------------|--------------|--------|-----------------------|------------|--------------------------|------------------------------------------------|
| 7/18/2020  | 11231        | 5559   | 38045                 | 21481      | 0.52                     | 0.37                                           |
| 7/25/2020  | 12919        | 6513   | 42802                 | 33434      | 0.39                     | 0.22                                           |
| 8/1/2020   | 11724        | 7855   | 49972                 | 38256      | 0.31                     | 0.19                                           |
| 8/8/2020   | 10511        | 7421   | 41313                 | 33153      | 0.32                     | 0.20                                           |
| 8/15/2020  | 10495        | 7126   | 38655                 | 31543      | 0.33                     | 0.20                                           |
| 8/22/2020  | 9218         | 6711   | 34466                 | 30226      | 0.30                     | 0.19                                           |
| 8/29/2020  | 8968         | 6309   | 31031                 | 29776      | 0.30                     | 0.17                                           |
| 9/5/2020   | 8424         | 5855   | 28242                 | 27010      | 0.31                     | 0.20                                           |
| 9/12/2020  | 7894         | 5124   | 26237                 | 28351      | 0.28                     | 0.19                                           |
| 9/19/2020  | 9647         | 5348   | 25382                 | 23924      | 0.40                     | 0.21                                           |
| 9/26/2020  | 11670        | 5439   | 25915                 | 24867      | 0.47                     | 0.21                                           |
| 10/3/2020  | 11101        | 4939   | 27804                 | 27575      | 0.40                     | 0.19                                           |
| 10/10/2020 | 14796        | 5172   | 31370                 | 33658      | 0.44                     | 0.17                                           |
| 10/17/2020 | 16401        | 5222   | 34934                 | 37027      | 0.44                     | 0.16                                           |
| 10/24/2020 | 17827        | 5812   | 39899                 | 40935      | 0.44                     | 0.18                                           |
| 10/31/2020 | 18628        | 6012   | 45983                 | 46467      | 0.40                     | 0.18                                           |
| 11/7/2020  | 19205        | 7303   | 55640                 | 56877      | 0.34                     | 0.20                                           |
| 11/14/2020 | 26176        | 8156   | 69432                 | 70999      | 0.37                     | 0.15                                           |
| 11/21/2020 | 28076        | 11119  | 81702                 | 81834      | 0.34                     | 0.20                                           |
| 11/28/2020 | 28688        | 10814  | 92351                 | 86841      | 0.33                     | 0.21                                           |
| 12/5/2020  | 27350        | 16033  | 98549                 | 94573      | 0.29                     | 0.20                                           |
| 12/12/2020 | 25706        | 17907  | 107227                | 101624     | 0.25                     | 0.16                                           |
| 12/19/2020 | 29842        | 19238  | 112272                | 104959     | 0.28                     | 0.22                                           |
| 12/26/2020 | 24350        | 16363  | 118892                | 106311     | 0.23                     | 0.22                                           |
| 1/9/2021   | 30576        | 23074  | 126420                | 116363     | 0.26                     | 0.19                                           |
| 1/16/2021  | 28946        | 23726  | 120658                | 108721     | 0.27                     | 0.20                                           |
| 1/23/2021  | 25395        | 21843  | 106881                | 93972      | 0.27                     | 0.22                                           |
| 1/30/2021  | 20226        | 22152  | 91286                 | 80589      | 0.25                     | 0.22                                           |
| 2/6/2021   | 18913        | 20667  | 77709                 | 69080      | 0.27                     | 0.19                                           |
| 2/13/2021  | 12303        | 17346  | 63237                 | 55607      | 0.22                     | 0.25                                           |
| 2/20/2021  | 8369         | 13155  | 53512                 | 46421      | 0.18                     | 0.25                                           |
| 2/27/2021  | 8429         | 13706  | 44799                 | 41727      | 0.20                     | NA                                             |
| 3/6/2021   | 6006         | 11791  | NA                    | 32075      | 0.19                     | NA                                             |

**Table S2.** Replicate excess death calculations based on OWID database.

|                      | Scenario 1      |                 | Scenario 2      |                 | Scenario 3      |                  |
|----------------------|-----------------|-----------------|-----------------|-----------------|-----------------|------------------|
| Transfused           | 38.90%          |                 | 50%             |                 | 0%              |                  |
| Week                 | Expected Deaths | Difference      | Expected Deaths | Difference      | Expected Deaths | Difference       |
| 8/1/2020             | 3974.94         | 3880.06         | 3625.35         | 4229.65         | 5332.66         | 1707.31          |
| 8/8/2020             | 6186.78         | 1234.22         | 5642.66         | 1778.34         | 8299.99         | 2657.33          |
| 8/15/2020            | 7079.06         | 46.94           | 6456.47         | 669.53          | 9497.05         | 3040.59          |
| 8/22/2020            | 6134.78         | 576.22          | 5595.23         | 1115.77         | 8230.23         | 2635.00          |
| 8/29/2020            | 5836.86         | 472.14          | 5323.51         | 985.49          | 7830.55         | 2507.04          |
| 9/5/2020             | 5593.16         | 261.84          | 5101.24         | 753.76          | 7503.60         | 2402.36          |
| 9/12/2020            | 5509.89         | -385.89         | 5025.30         | 98.70           | 7391.89         | 2366.60          |
| 9/19/2020            | 4998.05         | 349.95          | 4558.48         | 789.52          | 6705.23         | 2146.75          |
| 9/26/2020            | 5246.20         | 192.80          | 4784.80         | 654.20          | 7038.14         | 2253.34          |
| 10/3/2020            | 4427.00         | 512.00          | 4037.65         | 901.35          | 5939.13         | 1901.48          |
| 10/10/2020           | 4601.50         | 570.50          | 4196.80         | 975.20          | 6173.23         | 1976.43          |
| 10/17/2020           | 5102.60         | 119.40          | 4653.83         | 568.17          | 6845.49         | 2191.66          |
| 10/24/2020           | 6228.23         | -416.23         | 5680.46         | 131.54          | 8355.60         | 2675.14          |
| 10/31/2020           | 6851.64         | -839.64         | 6249.05         | -237.05         | 9191.95         | 2942.91          |
| 11/7/2020            | 7574.80         | -271.80         | 6908.60         | 394.40          | 10162.11        | 3253.51          |
| 11/14/2020           | 8598.46         | -442.46         | 7842.24         | 313.76          | 11535.43        | 3693.20          |
| 11/21/2020           | 10524.78        | 594.22          | 9599.13         | 1519.87         | 14119.72        | 4520.58          |
| 11/28/2020           | 13137.97        | -2323.97        | 11982.50        | -1168.50        | 17625.50        | 5643.00          |
| 12/5/2020            | 15142.93        | 890.07          | 13811.12        | 2221.88         | 20315.29        | 6504.17          |
| 12/12/2020           | 16069.45        | 1837.55         | 14656.16        | 3250.84         | 21558.28        | 6902.12          |
| 12/19/2020           | 17500.21        | 1737.79         | 15961.09        | 3276.91         | 23477.75        | 7516.66          |
| 12/26/2020           | 18804.96        | -2441.96        | 17151.08        | -788.08         | 25228.16        | 8077.08          |
| 1/9/2021             | 19422.09        | 3651.91         | 17713.93        | 5360.07         | 26056.07        | 8342.14          |
| 1/16/2021            | 19672.27        | 4053.73         | 17942.11        | 5783.89         | 26391.71        | 8449.60          |
| 1/23/2021            | 21532.33        | 310.67          | 19638.58        | 2204.42         | 28887.11        | 9248.53          |
| 1/30/2021            | 20118.22        | 2033.78         | 18348.84        | 3803.16         | 26989.99        | 8641.15          |
| 2/6/2021             | 17389.00        | 3278.00         | 15859.65        | 4807.35         | 23328.55        | 7468.89          |
| 2/13/2021            | 14912.55        | 2433.45         | 13601.01        | 3744.99         | 20006.22        | 6405.21          |
| 2/20/2021            | 12782.87        | 372.13          | 11658.63        | 1496.37         | 17149.11        | 5490.48          |
| 2/27/2021            | 10289.77        | 3416.23         | 9384.79         | 4321.21         | 13804.44        | 4419.64          |
| 3/6/2021             | 8589.95         | 3201.05         | 7834.47         | 3956.53         | 11524.01        | 3689.54          |
|                      |                 |                 |                 |                 |                 |                  |
| <b>Excess Deaths</b> |                 | <b>28904.69</b> |                 | <b>57913.24</b> |                 | <b>141669.44</b> |

**Table S3.** Mortality of COVID-19 in USA CCP efficacy studies.

| Study            | Location            | Type                               | Mortality |         | Relative risk of death with plasma | Reference     |
|------------------|---------------------|------------------------------------|-----------|---------|------------------------------------|---------------|
|                  |                     |                                    | CCP       | Control |                                    |               |
| Salazar et al.   | Houston, TX         | Matched Cohort Design              | 6.2       | 12.5    | 0.50                               | <sup>25</sup> |
| Liu et al.       | New York City       | Matched Cohort Design              | 12.8      | 24.4    | 0.52                               | <sup>8</sup>  |
| Shenoy et al.    | Washington, DC      | Matched Cohort Design              | 25        | 27      | 0.93                               | <sup>50</sup> |
| Donato et al.    | New Jersey          | Matched Cohort Design              | 11.1      | 27.1    | 0.41                               | <sup>51</sup> |
| Yoon et al.      | New York City       | Matched Cohort Design              | 32.8      | 37.5    | 0.87                               | <sup>52</sup> |
| O'Donnell et al. | New York City       | Double Blind Randomized Controlled | 12.6      | 24.6    | 0.51                               | <sup>53</sup> |
| Sostin et al.    | Hartford, CT        | Matched Cohort Design              | 20        | 24.6    | 0.81                               | <sup>54</sup> |
| Sturek et al.    | Charlottesville, VA | Matched Cohort Design              | 6.9       | 10.4    | 0.66                               | <sup>55</sup> |
| Average          |                     |                                    | 15.9      | 23.5    | 0.68                               |               |

**Table S4.** Data from and calculations for excess mortality from CCP hesitancy based on the CDC database.

| Starting date for seven-day period for Hospitalizations | Starting date for seven-day period for deaths | Plasma Distributions | Deaths | Hospitalizations | Plasma Doses Per Patient | Mortality (Deaths / Admissions - 2 Week Shift) |
|---------------------------------------------------------|-----------------------------------------------|----------------------|--------|------------------|--------------------------|------------------------------------------------|
| 2020-08-03                                              | 2020-08-17                                    | 10511                | 6854   | 31448            | 0.3342343                | 0.2179471                                      |
| 2020-08-10                                              | 2020-08-24                                    | 10495                | 6395   | 29914            | 0.3508391                | 0.2137795                                      |
| 2020-08-17                                              | 2020-08-31                                    | 9218                 | 5894   | 28841            | 0.3196144                | 0.2043618                                      |
| 2020-08-24                                              | 2020-09-07                                    | 8968                 | 5154   | 28335            | 0.3164990                | 0.1818952                                      |
| 2020-08-31                                              | 2020-09-14                                    | 8424                 | 5316   | 25850            | 0.3258801                | 0.2056480                                      |
| 2020-09-07                                              | 2020-09-21                                    | 7894                 | 5301   | 24432            | 0.3231009                | 0.2169695                                      |
| 2020-09-14                                              | 2020-09-28                                    | 9647                 | 4854   | 22795            | 0.4232068                | 0.2129414                                      |
| 2020-09-21                                              | 2020-10-05                                    | 11670                | 4905   | 23851            | 0.4892877                | 0.2056518                                      |
| 2020-09-28                                              | 2020-10-12                                    | 11101                | 4895   | 26365            | 0.4210506                | 0.1856628                                      |
| 2020-10-05                                              | 2020-10-19                                    | 14796                | 5592   | 32198            | 0.4595316                | 0.1736754                                      |
| 2020-10-12                                              | 2020-10-26                                    | 16401                | 5775   | 35493            | 0.4620911                | 0.1627081                                      |
| 2020-10-19                                              | 2020-11-02                                    | 17827                | 6651   | 39595            | 0.4502336                | 0.1679758                                      |
| 2020-10-26                                              | 2020-11-09                                    | 18628                | 8482   | 45067            | 0.4133401                | 0.1882087                                      |
| 2020-11-02                                              | 2020-11-16                                    | 19205                | 10447  | 54855            | 0.3501048                | 0.1904475                                      |
| 2020-11-09                                              | 2020-11-23                                    | 26176                | 10158  | 69243            | 0.3780310                | 0.1467007                                      |

| <b>Starting date for seven-day period for Hospitalizations</b> | <b>Starting date for seven-day period for deaths</b> | <b>Plasma Distributions</b> | <b>Deaths</b> | <b>Hospitalizations</b> | <b>Plasma Doses Per Patient</b> | <b>Mortality (Deaths / Admissions - 2 Week Shift)</b> |
|----------------------------------------------------------------|------------------------------------------------------|-----------------------------|---------------|-------------------------|---------------------------------|-------------------------------------------------------|
| 2020-11-16                                                     | 2020-11-30                                           | 28076                       | 15177         | 80036                   | 0.3507921                       | 0.1896272                                             |
| 2020-11-23                                                     | 2020-12-07                                           | 28688                       | 17031         | 84937                   | 0.3377562                       | 0.2005133                                             |
| 2020-11-30                                                     | 2020-12-14                                           | 27350                       | 18634         | 92813                   | 0.2946785                       | 0.2007693                                             |
| 2020-12-07                                                     | 2020-12-21                                           | 25706                       | 15526         | 99678                   | 0.2578904                       | 0.1557616                                             |
| 2020-12-14                                                     | 2020-12-28                                           | 29842                       | 18425         | 102606                  | 0.2908407                       | 0.1795704                                             |
| 2020-12-21                                                     | 2021-01-04                                           | 24350                       | 22605         | 103921                  | 0.2343126                       | 0.2175210                                             |
| 2020-12-28                                                     | 2021-01-11                                           | 25475                       | 23334         | 109965                  | 0.2316646                       | 0.2121948                                             |
| 2021-01-04                                                     | 2021-01-18                                           | 30576                       | 21711         | 114279                  | 0.2675557                       | 0.1899824                                             |
| 2021-01-11                                                     | 2021-01-25                                           | 28946                       | 21978         | 106434                  | 0.2719620                       | 0.2064942                                             |
| 2021-01-18                                                     | 2021-02-01                                           | 25395                       | 20351         | 92383                   | 0.2748882                       | 0.2202894                                             |
| 2021-01-25                                                     | 2021-02-08                                           | 20226                       | 17991         | 79549                   | 0.2542584                       | 0.2261625                                             |
| 2021-02-01                                                     | 2021-02-15                                           | 18913                       | 13455         | 67999                   | 0.2781364                       | 0.1978706                                             |
| 2021-02-08                                                     | 2021-02-22                                           | 12303                       | 13553         | 54321                   | 0.2264870                       | 0.2494984                                             |
| 2021-02-15                                                     | 2021-03-01                                           | 8369                        | 11938         | 45664                   | 0.1832735                       | 0.2614313                                             |
| 2021-02-22                                                     | 2021-03-08                                           | 8429                        | 8152          | 40635                   | 0.2074320                       | 0.2006152                                             |

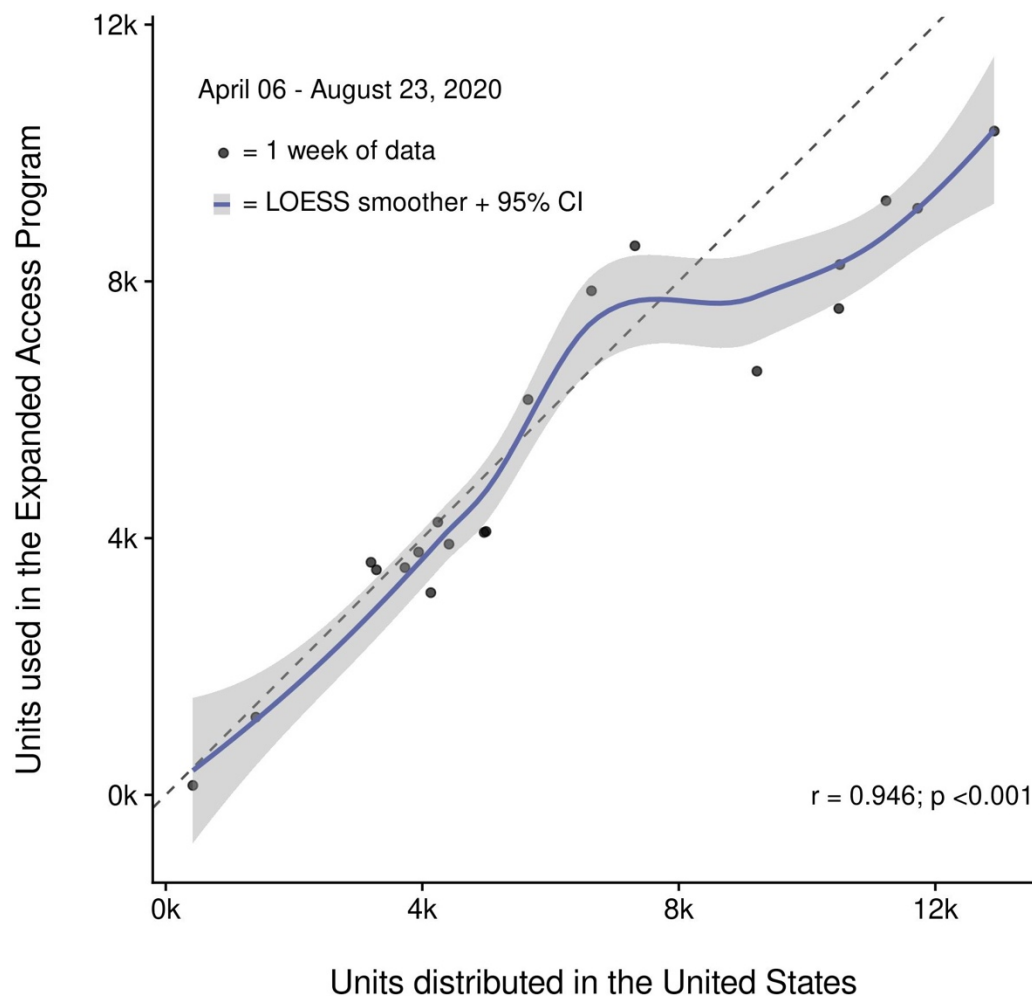

**Supplementary Figure 1.** Correlation of convalescent plasma distribution and usage within the Expanded Access Program. Shown is the progressive increase in the number of convalescent plasma units distributed in the United States and convalescent plasma units used in the Expanded Access Program (EAP). Data between April 06 and August 23, 2020 are pooled in weekly intervals and represented as filled circles. The Pearson correlation coefficient was used to assess correlation ( $r = 0.946$ ,  $P < 0.001$ ) and a LOESS smoother with a 95% confidence interval (CI) and a reference line were overlaid. Points below the reference line represent weeks where more convalescent plasma was distributed than used within the EAP. Conversely, points above the reference line are indicative of more convalescent plasma being used in the EAP than distributed.

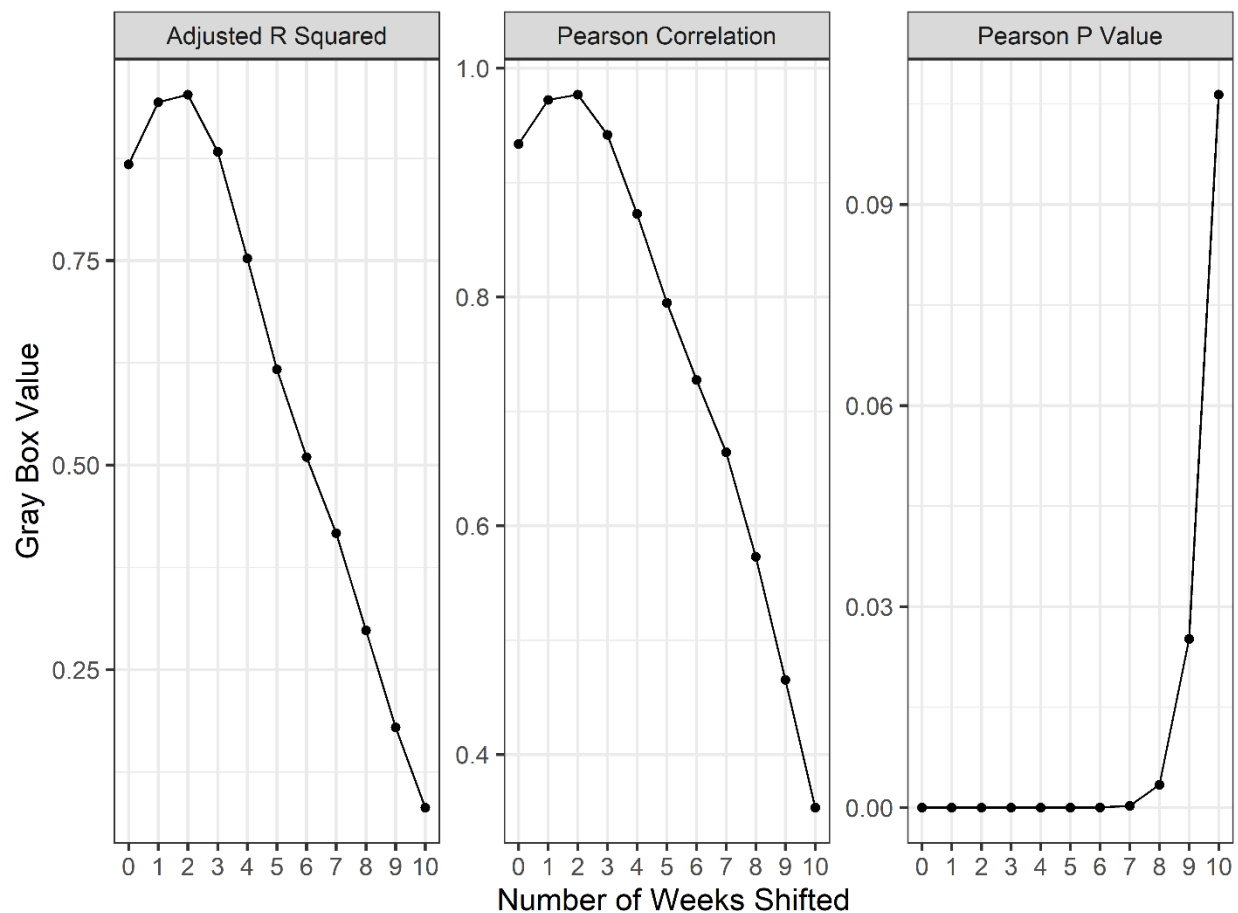

**Supplemental Figure 2.** A series of linear regressions and Pearson’s correlation tests comparing weekly reported deaths to new weekly hospital admissions, offset by various numbers of weeks to identify the length of lag between admission and death of patients. Y axes values reflect the parameter of each gray box throughout the shifted weeks. Correlations peak at 2-3 weeks shifted, suggesting the lag time between admission and reported death is roughly two weeks

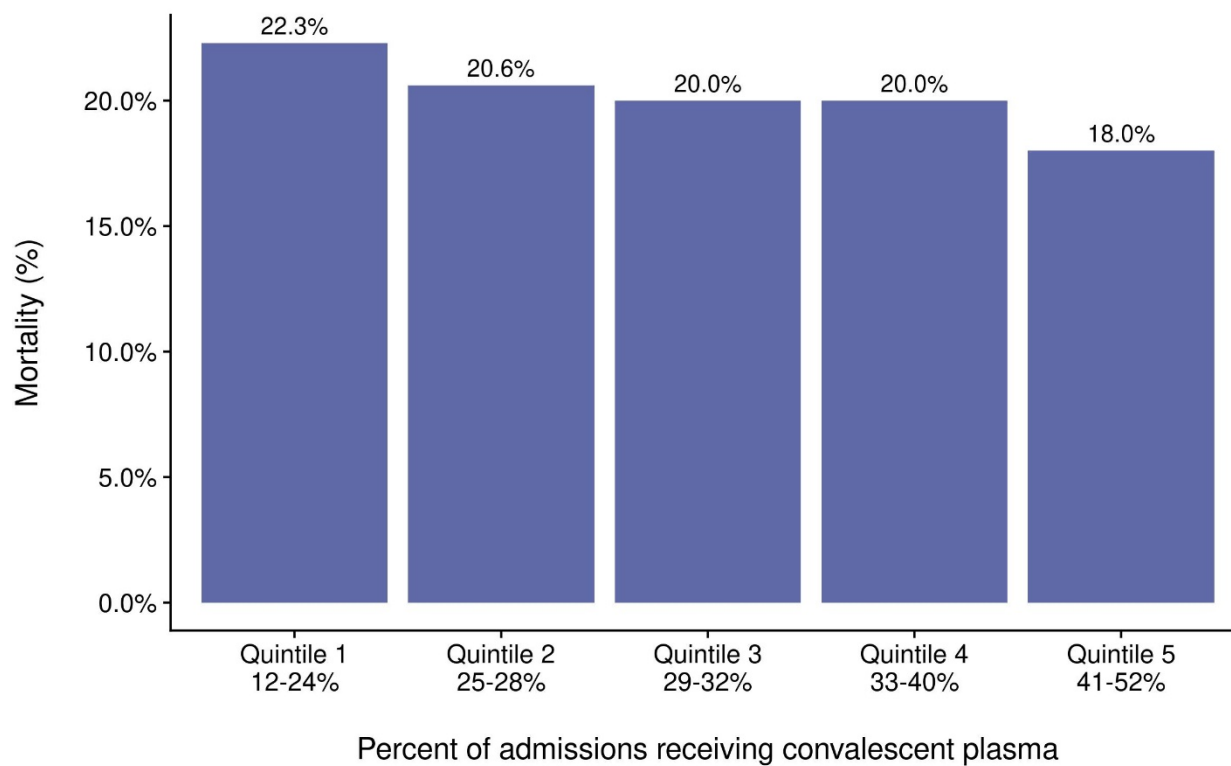

**Supplemental Figure 3.** Mortality from COVID-19 by quintile of percent of admissions receiving CCP.



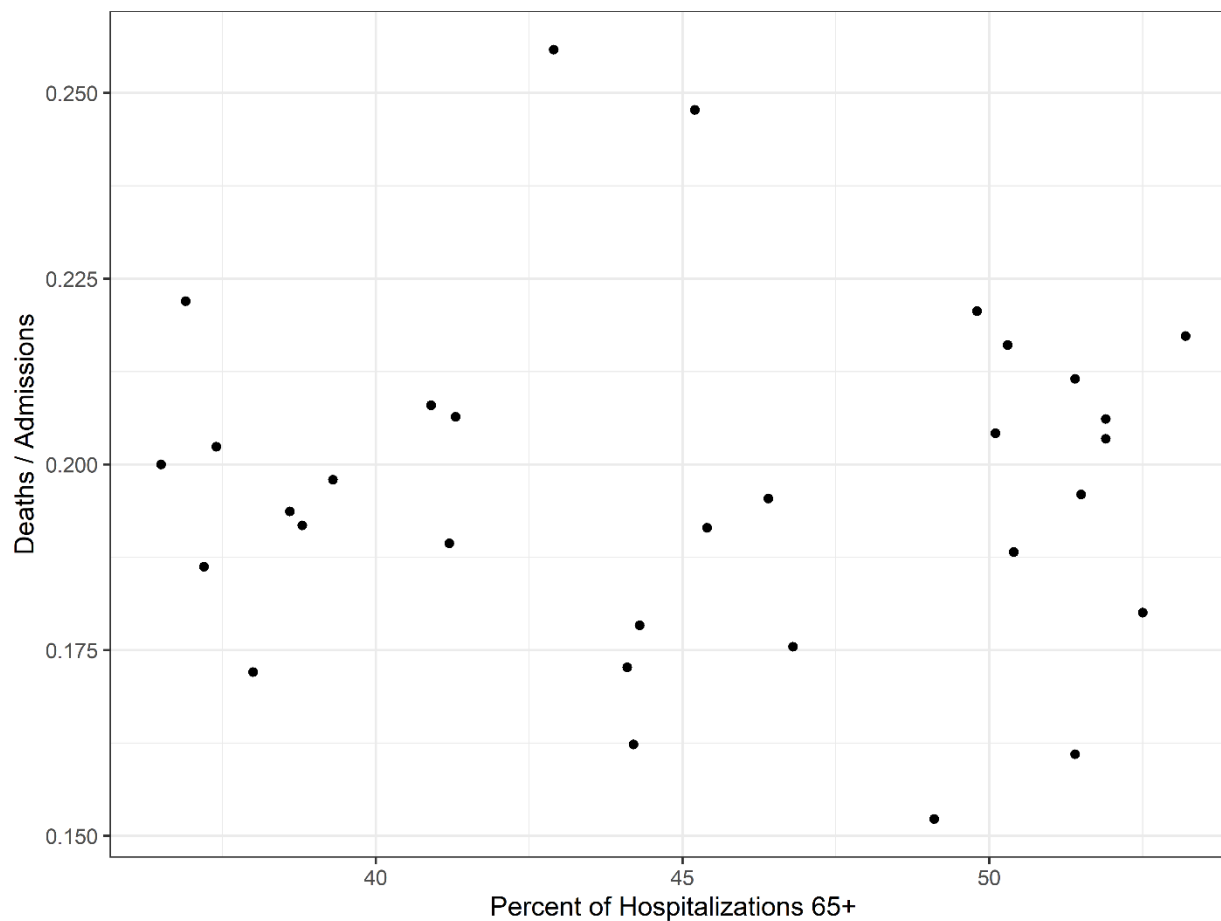

**Supplemental Figure 4.** Investigation of high age group mortality. The shifted mortality is compared to the percent of hospitalized patients 65+ each week as reported by the CDC. There is no significant correlation between the two variables, suggesting changes in mortality are not explainable by an increase in hospitalized high risk patients.

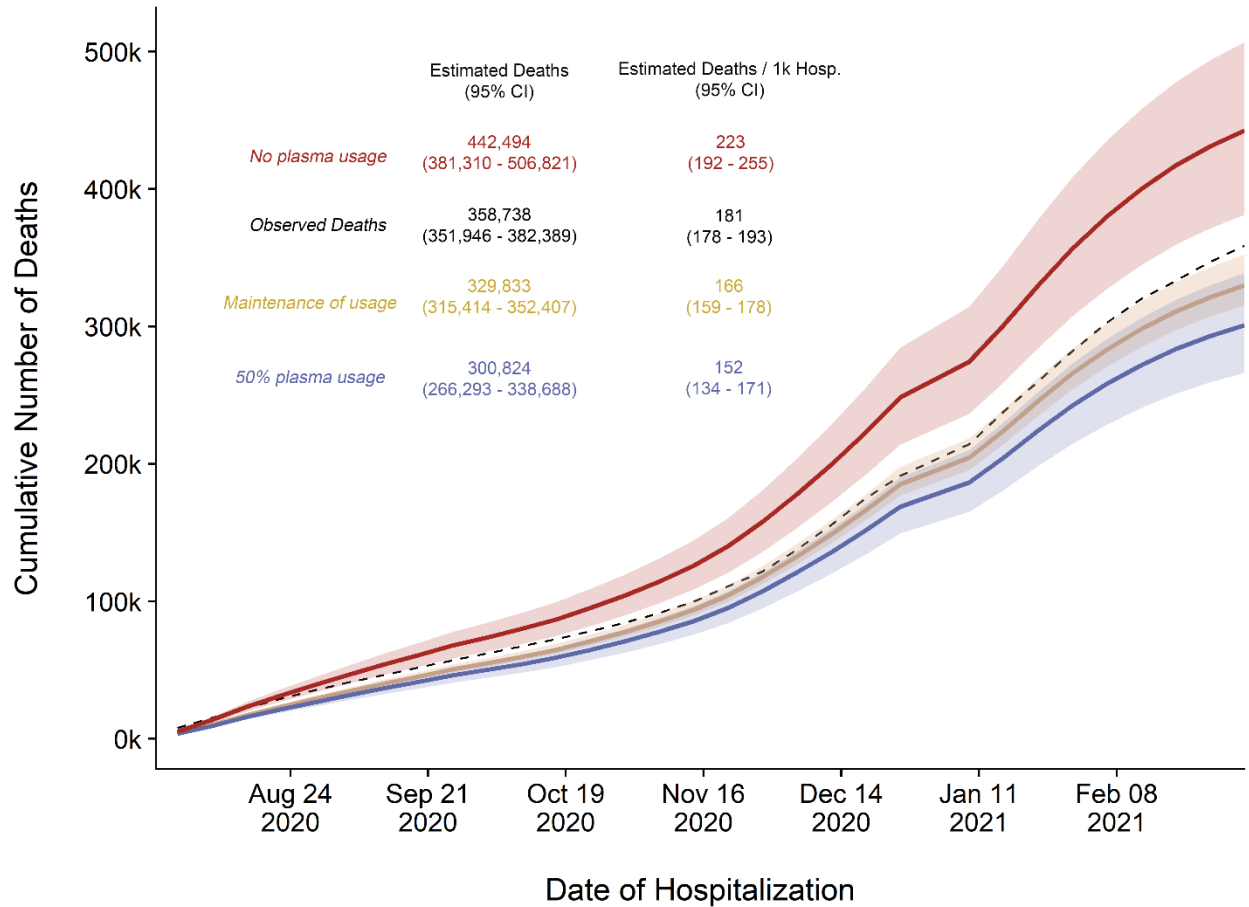

**Supplemental Figure 5.** Replicated cumulative excess deaths analysis per OWID database for scenario 1 (orange) : Maintained plasma transfusion rate from Oct-Nov throughout period, scenario 2 (blue): 50% transfusion rate throughout period, and scenario 3 (red): 0% transfusion rate throughout period. Black dashed line represents observed cumulative deaths per OWID reporting.
